# Supplementary material for: Sulfur-Oxidizing Bacteria Mediate Microbial Community Succession and Element Cycling in Launched Marine Sediment
Source: PubMed Central journal article supplement (PMC5289976; doi:10.3389/fmicb.2017.00152), 2017-02-03
Supplement: DataSheet1.pdf [file DataSheet1.pdf]

## *Supplementary information*

### **Sulfur-oxidizing bacteria mediate microbial community succession and element cycling in launched marine sediment**

Hideyuki Ihara<sup>1</sup>, Tomoyuki Hori<sup>2\*</sup>, Tomo Aoyagi<sup>2</sup>, Mitsuru Takasaki<sup>3</sup>, Yoko Katayama<sup>4\*</sup>

1 United Graduate School of Agricultural Science, Tokyo University of Agriculture and Technology, Fuchu, Japan

2 Environmental Management Research Institute, National Institute of Advanced Industrial Science and Technology, Tsukuba, Japan

3 Department of Food and Environmental Sciences, Faculty of Science and Engineering, Ishinomaki Senshu University, Ishinomaki, Japan

4 Institute of Agriculture, Tokyo University of Agriculture and Technology, Fuchu, Japan

**\* Correspondence:**

Yoko Katayama: e-mail: [katayama@cc.tuat.ac.jp](mailto:katayama@cc.tuat.ac.jp).

Tomoyuki Hori: e-mail: [horitomo@aist.go.jp](mailto:horitomo@aist.go.jp).

### ***Details of prior analysis.***

The launched marine sediments were collected six times (December 2011; March, July and November 2012; May and October 2013). Microbial community structures in the uppermost (0-2 mm depth) and deep (20-40 mm depth) layers of the sediments were analyzed in singlicate. Deep sequencing based on 16S rRNA genes and further analyses (i.e., phylogenetic analysis and principal coordinate analysis [PCoA]) were carried out as described in the main text. Microbial communities in the uppermost layer changed with time (Figure S3A). PCoA plot suggested that microbial communities in the uppermost layers in December 2011 and October 2013 were considerably different from those in the other dates (Figure S3B). Based on the phylogenetic information and PCoA plot, we chose the sediment samples collected in December 2011, March 2012 and October 2013 for the main triplicate analyses.

### ***Details of metal analysis.***

The on-site sediment was dried at 60 °C until the weight becomes constant, and then ground with a mortar and pestle. The resultant sediment (0.4–0.6 g) was weighed in a polytetrafluoroethylene (PTFE) beaker, added 10 mL of concentrated nitric acid and 2.5 mL of 60% perchloric acid, and then heated in the beaker covered with a PTFE watch glass at around 200 °C. As soon as white smoke was observed, the watch glass was removed and the heating was continued until the solution became syrupy. The solution was allowed to cool at room temperature and then 3.5 mL of 60% perchloric acid and 10 mL of 46% hydrofluoric acid were added. The mixture was heated without seething for around 15 min. After the solution was cooled, 10 mL of 46% hydrofluoric acid was added and the mixture was again heated until it became syrupy. After adding 5 mL of 20% hydrochloric acid and 1 mL of concentrated nitric acid, the extract was heated by covering with a watch glass for 1 h. Then, the extract was added 30 mL distilled water and heated more 1–2 h covered with the watch glass. The solution was subjected to inductively coupled plasma mass spectrometry (7500a; Agilent Technologies Inc., Tokyo, Japan) after dilution of the sample within the sensitivity range of the equipment.

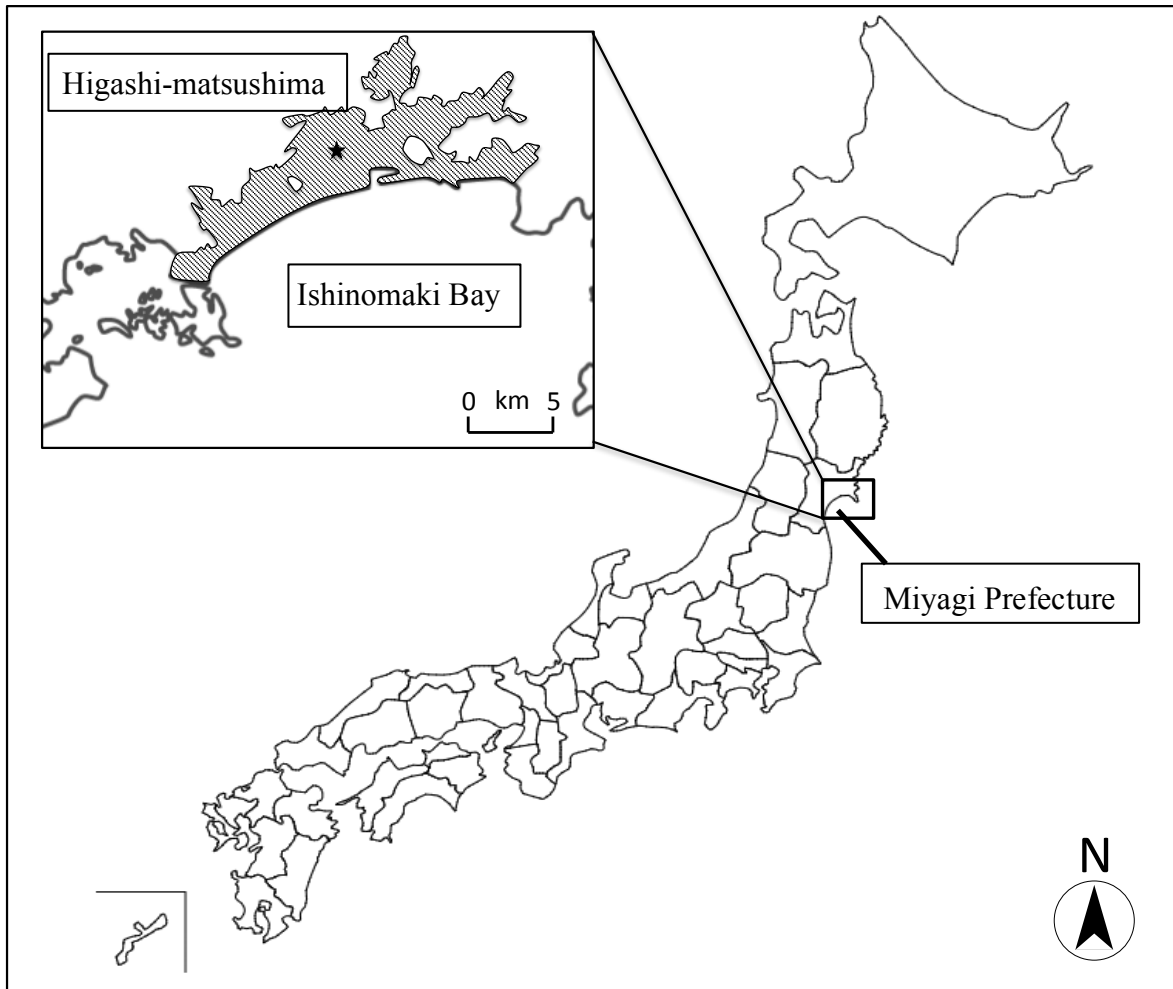

**Figure S1.** Location of sampling site. The launched marine sediment was collected from the area where had been used as paddy field in Higashi-matsushima city, Miyagi Prefecture, Japan. Distance of sampling site shown by the star symbol was approximately 3 km far from the shore and 1 m above the sea level. Jougawa river flows near the site. Shaded portion in inset shows the flooded area by tsunami accompanied with the Great East Japan Earthquake.

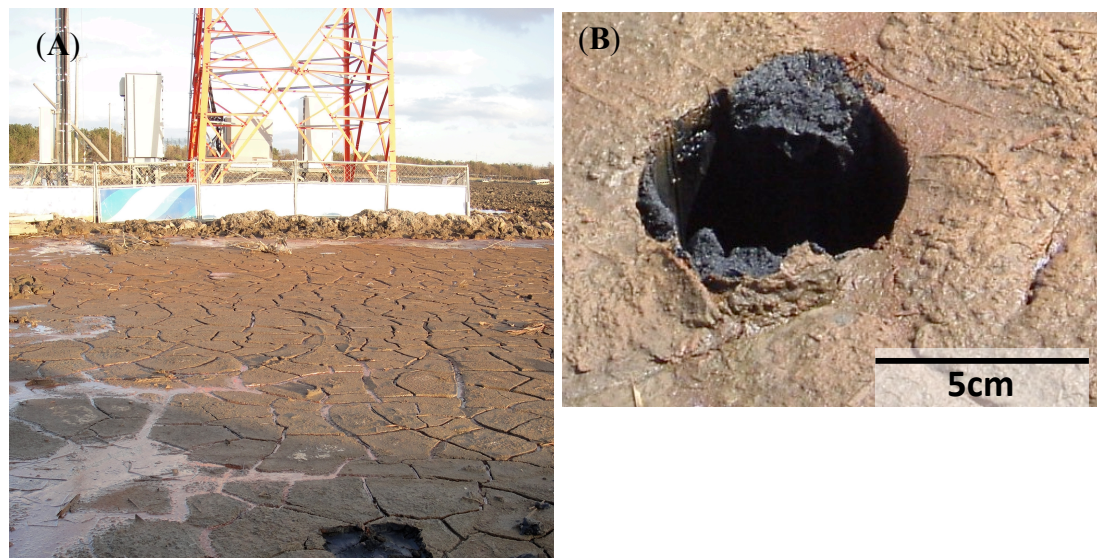

**Figure S2.** Photographs of the on-site sediment. **(A)** The sediment deposited on the paddy field in December 2011. Depth of the sediment was more than 30 cm. **(B)** Close-up picture of the sediment after the sampling with the core sampler. The uppermost (0-2 mm depth) layer was reddish brown while the deeper layer was black.

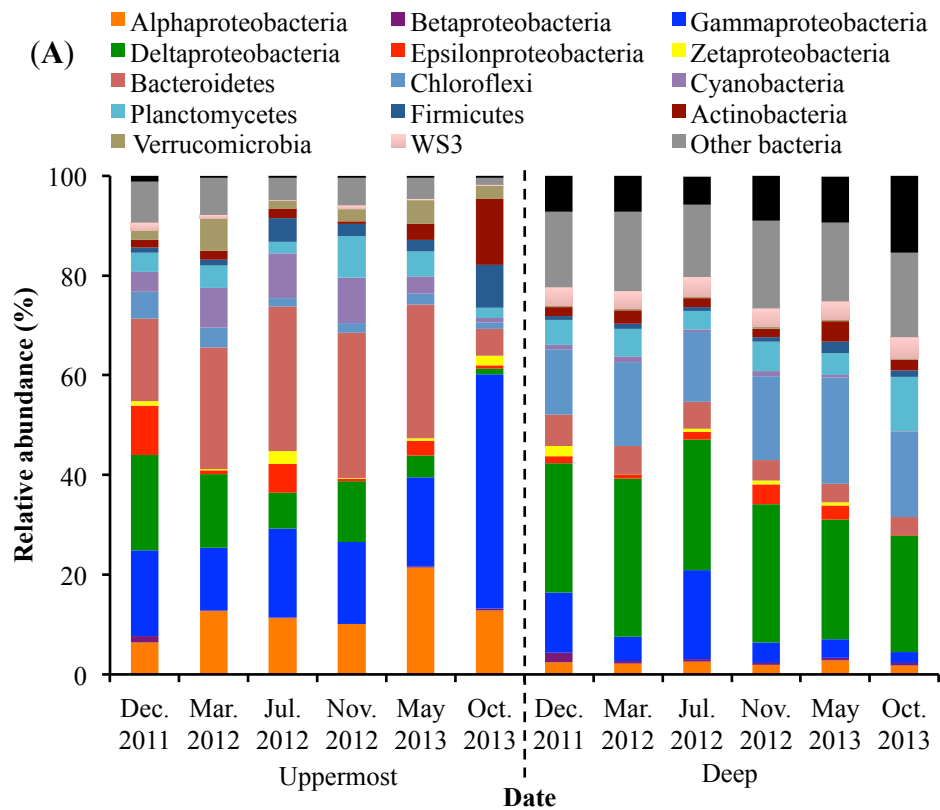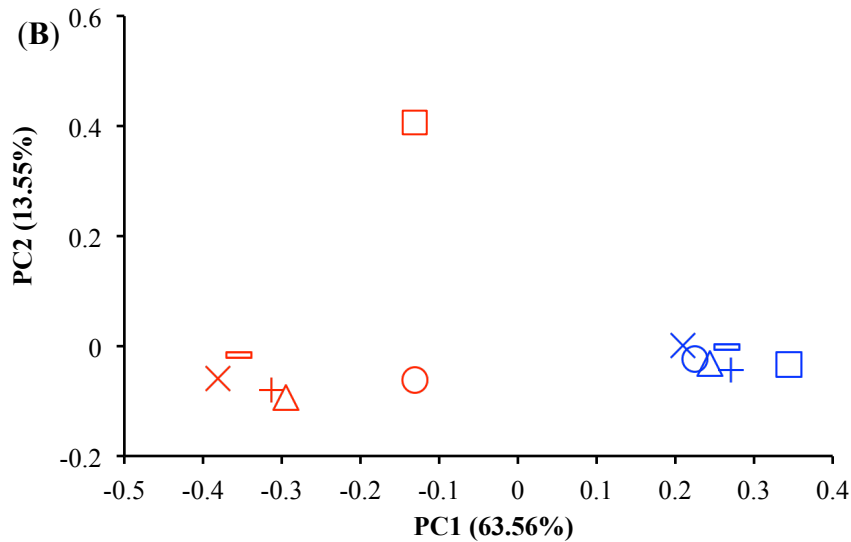

**Figure S3.** Prior analysis data of the on-site microbial community structures in the uppermost (0–2 mm depth) and deep (20–40 mm depth) layers by deep sequencing of 16S rRNA genes ( $n = 1$ ). Sediment samples were collected in December 2011, March, July and November 2012, May and October 2013. **(A)** Microbial communities are categorized by phylum except for Proteobacteria that is shown by class. **(B)** Comparison of microbial community structures in the uppermost (0–2 mm depth, red) and deep (20–40 mm depth, blue) layers based on principal coordinate analysis (PCoA) ( $n=1$ ). These plots were calculated from an equal number of sequences (15,034) by weighted UniFrac analysis. Symbols;  $\circ$ , December 2011;  $\Delta$ , March 2012;  $\times$ , July 2012;  $+$ , November 2012;  $-$ , May 2013;  $\square$ , October 2013.

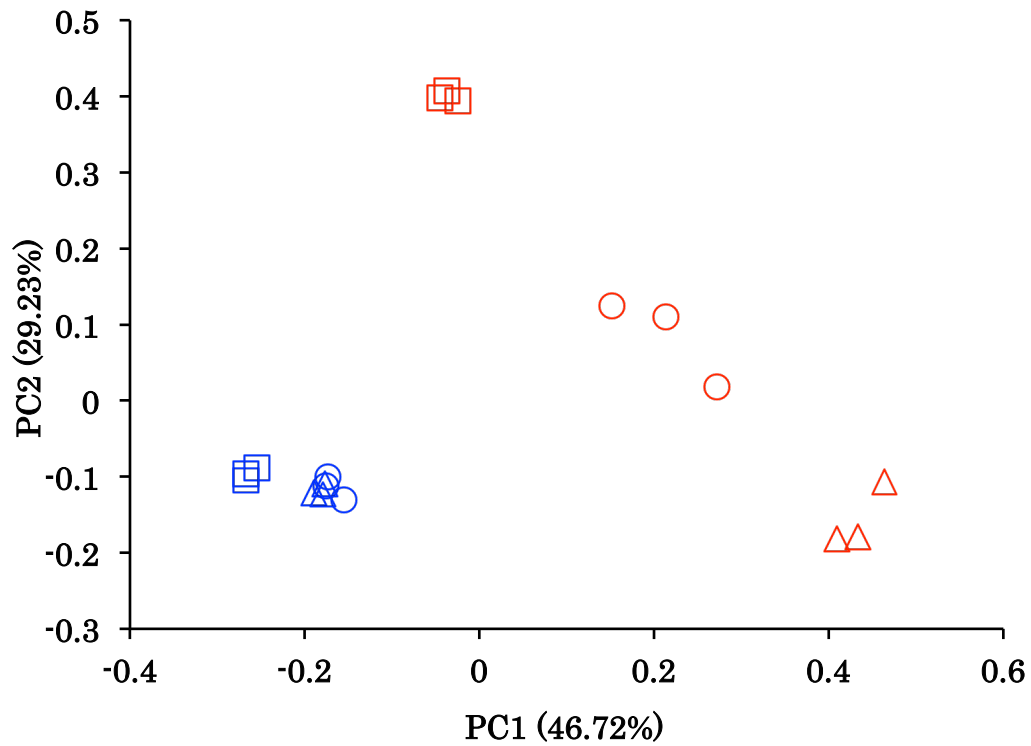

**Figure S4.** Comparison of the on-site microbial community structures in the uppermost (0-2 mm depth, red) and deep (20-40 mm depth, blue) layers based on principal coordinate analysis (PCoA) (n=3). These plots were calculated from an equal number of sequences (30,789) by weighted UniFrac analysis. Symbols; ○, December 2011; △, March 2012; □, October 2013.

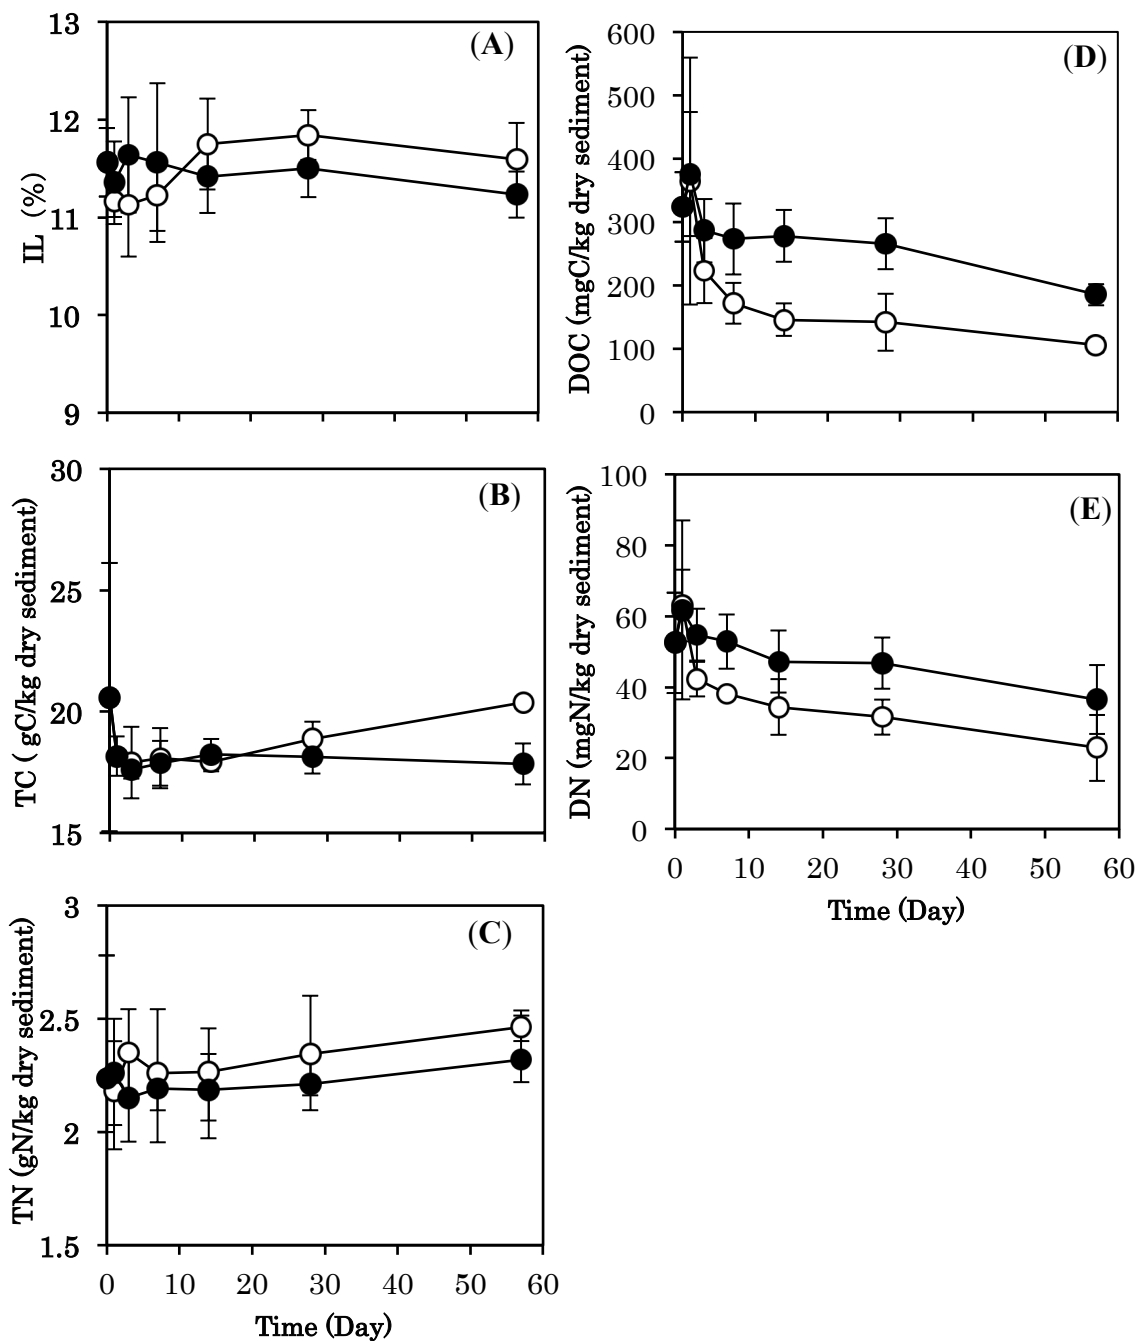

**Figure S5.** Time-course changes of (A) IL, (B) TC, (C) TN, (D) DOC and (E) DN in the sediments incubated in laboratory (n=3). Open and filled circles indicate the uppermost (0-2 mm depth) and deep (12-16 mm depth) layers, respectively. Error bars indicate standard deviations of quadruplicate samples.

**Table S1** Changes of pH and sulfate concentration in the uppermost layer of on-site sediment

| Sampling date | pH <sup>a</sup> | SO <sub>4</sub> <sup>2-</sup> (mg / kg dry sediment) <sup>b</sup> |
|---------------|-----------------|-------------------------------------------------------------------|
| Dec. 2011     | 4.3 ± 0.6       | 3317 ± 317                                                        |
| Mar. 2012     | 7.1 ± 0.2       | 3025 ± 95                                                         |
| Oct. 2013     | 4.4 ± 0.0       | 15,165                                                            |

<sup>a</sup> The pH values were analyzed in triplicate. The symbol “±” means the standard deviation of three replications.

<sup>b</sup> The sulfate concentrations except for that in October 2013 were analyzed in duplicate. The symbol “±” means the variation between two replications. Due to the small quantity of obtained sample, sulfate concentration in October 2013 was measured in singlicate.



**Table S2** Summary of Illumina sequencing of the on-site sediment<sup>a</sup> (n=3)

| Layer     | Sampling date | No. of sequences  | No. of OTUs    | $\alpha$ -diversity indices <sup>b</sup> |                |              |
|-----------|---------------|-------------------|----------------|------------------------------------------|----------------|--------------|
|           |               |                   |                | Chao1                                    | Shannon        | 1/Simpson    |
| Uppermost | Dec. 2011     | 38,069 $\pm$ 3753 | 2055 $\pm$ 82  | 7430 $\pm$ 773                           | 7.4 $\pm$ 0.9  | 36 $\pm$ 26  |
|           | Mar. 2012     | 47,449 $\pm$ 4701 | 1838 $\pm$ 304 | 5546 $\pm$ 1322                          | 8.2 $\pm$ 0.2  | 61 $\pm$ 13  |
|           | Oct. 2013     | 39,880 $\pm$ 5718 | 743 $\pm$ 41   | 2279 $\pm$ 78                            | 6.6 $\pm$ 0.2  | 24 $\pm$ 5   |
| Deep      | Dec. 2011     | 34,808 $\pm$ 2432 | 2832 $\pm$ 53  | 14,081 $\pm$ 308                         | 10.5 $\pm$ 0.0 | 310 $\pm$ 20 |
|           | Mar. 2012     | 40,886 $\pm$ 2216 | 2818 $\pm$ 30  | 14,036 $\pm$ 400                         | 10.4 $\pm$ 0.1 | 277 $\pm$ 14 |
|           | Oct. 2013     | 37,556 $\pm$ 1446 | 2663 $\pm$ 22  | 13,000 $\pm$ 514                         | 10.4 $\pm$ 0.0 | 289 $\pm$ 18 |

<sup>a</sup> The symbol “ $\pm$ ” means the standard deviation of three replications.

5 <sup>b</sup> Diversity indices were calculated by using an equal number of sequences (30,789) subsampled 10 times from original libraries.

10

15

**Table S3** Most abundant OTUs and their closely related species found in the uppermost and deep layers of the on-site sediment

| Layer     | Sampling date | OTU No. | Closely related species <sup>a</sup>    | Similarity (%) | Accession No. | Phylum/Class <sup>b</sup> | Relative abundance (%) <sup>c</sup> | <i>p</i> -value <sup>d</sup> | Putative function <sup>e</sup> |
|-----------|---------------|---------|-----------------------------------------|----------------|---------------|---------------------------|-------------------------------------|------------------------------|--------------------------------|
| Uppermost | Dec. 2011     | 1598    | <i>Pandoraea thiooxydans</i>            | 98             | EF397578      | Betaproteobacteria        | 12.4 ± 5.5                          | 0.02*                        | SO                             |
|           |               | 11292   | <i>Sulfurimonas denitrificans</i>       | 94             | L40808        | Epsilonproteobacteria     | 8.7 ± 4.1                           | 0.03*                        | Unknown                        |
|           |               | 11288   | <i>Sulfurimonas</i> sp.                 | 95             | AB930173      | Epsilonproteobacteria     | 6.5 ± 2.3                           | 0.01**                       | SO                             |
|           |               | 3053    | <i>Thiomicrospira frisia</i>            | 96             | AF013974      | Gammaproteobacteria       | 6.1 ± 2.8                           | 0.02*                        | SO                             |
|           |               | 10262   | <i>Sulfurimonas denitrificans</i>       | 98             | L40808        | Epsilonproteobacteria     | 3.5 ± 0.6                           | 0.001**                      | SO, NR                         |
|           | Mar. 2012     | 6337    | <i>Gaetbulibacter lutimaris</i>         | 100            | JF739861      | Bacteroidetes             | 10 ± 3.0                            | 0.005**                      | CO                             |
|           |               | 17127   | Cyanobacterium sp.                      | 98             | FJ460075      | Cyanobacteria             | 3.6 ± 1.2                           | 0.008**                      | PS                             |
|           |               | 17093   | <i>Luteolibacter algae</i>              | 98             | AB331894      | Verrucomicrobia           | 3.1 ± 0.9                           | 0.004**                      | ChemO                          |
|           |               | 20040   | <i>Roseovarius tolerans</i>             | 100            | KP723471      | Alphaproteobacteria       | 2.6 ± 0.2                           | <0.001**                     | ChemO                          |
|           |               | 7510    | <i>Sagittula stellata</i>               | 100            | HG315014      | Alphaproteobacteria       | 2.3 ± 0.5                           | 0.002**                      | ChemO                          |
|           | Oct. 2013     | 17626   | <i>Oleigrimonas soli</i>                | 98             | KM400682      | Gammaproteobacteria       | 13.4 ± 1.4                          | <0.001**                     | ChemO, NR                      |
|           |               | 8977    | <i>Luteibacter yejuensis</i>            | 99             | KM019785      | Gammaproteobacteria       | 13.1 ± 3.0                          | 0.002**                      | ChemO                          |
|           |               | 25201   | <i>Dyella ginsengisoli</i>              | 99             | KC129050      | Gammaproteobacteria       | 6.1 ± 0.9                           | <0.001**                     | ChemO                          |
|           |               | 11118   | <i>Dyella japonica</i>                  | 96             | KP634993      | Gammaproteobacteria       | 4.5 ± 0.2                           | <0.001**                     | ChemO, NR                      |
|           |               | 17622   | <i>Streptomyces hoynatensis</i>         | 96             | JQ582693      | Actinobacteria            | 2.5 ± 0.2                           | <0.001**                     | ChemO                          |
| Deep      | Dec. 2011     | 21210   | <i>Desulfobulbus elongatus</i>          | 92             | X95180        | Deltaproteobacteria       | 3.7 ± 0.5                           | -                            | Unknown                        |
|           |               | 14208   | <i>Pelobacter</i> sp.                   | 100            | AJ271656      | Deltaproteobacteria       | 1.8 ± 0.2                           | -                            | ChemO                          |
|           |               | 11211   | <i>Desulfofaba fastidiosa</i>           | 95             | AY268891      | Deltaproteobacteria       | 1.5 ± 0.2                           | -                            | SR                             |
|           |               | 7299    | <i>Thermomarinilinea lacunofontalis</i> | 88             | AB669272      | Chloroflexi               | 1.3 ± 0.1                           | -                            | Unknown                        |
|           |               | 28763   | <i>Desulfobulbus</i> sp.                | 96             | EF442993      | Deltaproteobacteria       | 1.3 ± 0.2                           | -                            | SR                             |
|           | Mar. 2012     | 21210   | <i>Desulfobulbus elongatus</i>          | 92             | X95180        | Deltaproteobacteria       | 3 ± 0.2                             | -                            | Unknown                        |
|           |               | 14208   | <i>Pelobacter</i> sp.                   | 100            | AJ271656      | Deltaproteobacteria       | 2.6 ± 0.1                           | -                            | ChemO                          |
|           |               | 7299    | <i>Thermomarinilinea lacunofontalis</i> | 88             | AB669272      | Chloroflexi               | 1.9 ± 0.2                           | -                            | Unknown                        |
|           |               | 7679    | <i>Pelobacter</i> sp.                   | 96             | AJ271656      | Deltaproteobacteria       | 1.8 ± 0.3                           | -                            | ChemO                          |
|           |               | 25698   | <i>Lutimonas saemankumensis</i>         | 100            | JQ661174      | Bacteroidetes             | 1.4 ± 0.1                           | -                            | ChemO, NR                      |
|           | Oct. 2013     | 21210   | <i>Desulfobulbus elongatus</i>          | 92             | X95180        | Deltaproteobacteria       | 3.6 ± 0.5                           | -                            | Unknown                        |
|           |               | 7299    | <i>Thermomarinilinea lacunofontalis</i> | 88             | AB669272      | Chloroflexi               | 1.9 ± 0.4                           | -                            | Unknown                        |
|           |               | 30145   | <i>Thermomarinilinea lacunofontalis</i> | 88             | AB669272      | Chloroflexi               | 1.6 ± 0.3                           | -                            | Unknown                        |
|           |               | 6911    | <i>Ornatilinea apprima</i>              | 90             | JQ292916      | Chloroflexi               | 1.5 ± 0.1                           | -                            | Unknown                        |
|           |               | 11211   | <i>Desulfofaba fastidiosa</i>           | 95             | AY268891      | Deltaproteobacteria       | 1.4 ± 0.4                           | -                            | SR                             |

<sup>a</sup> The closely related species were assigned on BLAST in the DDBJ.

<sup>b</sup> The OTUs were characterized phylogenetically by using the QIIME software.

25 <sup>c</sup> The symbol “±” means the standard deviation of three replications.

<sup>d</sup> *p*-values indicate whether the relative abundance of OTU was significantly high comparing with that in the deep layer: (\*)  $p < 0.05$ , (\*\*)  $p < 0.01$ .

<sup>e</sup> The putative function of closely related species (only sequence similarities >95%). SO, sulfur oxidation; SR, sulfate reduction; FeO, Fe(II) oxidation; ChemO, chemoorganotrophy; NR, nitrate reduction; PS, photosynthesis.

30

35

40

45

50

**Table S4** Number of 16S rRNA gene copies and summary of Illumina sequencing of the sediment incubated in laboratory<sup>a</sup>

| Layer                | Incubation day | No. of copies (n=2) <sup>b</sup>            | No. of sequences (n=3) | No. of OTUs (n=3) | $\alpha$ -diversity indices (n=3) <sup>c</sup> |                |               |
|----------------------|----------------|---------------------------------------------|------------------------|-------------------|------------------------------------------------|----------------|---------------|
|                      |                |                                             |                        |                   | Chao1                                          | Shannon        | 1/Simpson     |
| Initial <sup>d</sup> | -              | $1.4 \times 10^{10} \pm 0.2 \times 10^{10}$ | 50,580 $\pm$ 4858      | 3196 $\pm$ 61     | 14,524 $\pm$ 618                               | 10.2 $\pm$ 0.2 | 230 $\pm$ 57  |
| Uppermost            | 1              | $1.8 \times 10^{10} \pm 0.4 \times 10^{10}$ | 54,031 $\pm$ 9851      | 3016 $\pm$ 150    | 11,601 $\pm$ 38                                | 8.4 $\pm$ 0.1  | 29 $\pm$ 0.4  |
|                      | 3              | $2.5 \times 10^{10} \pm 0.2 \times 10^{10}$ | 60,909 $\pm$ 2682      | 2343 $\pm$ 221    | 7616 $\pm$ 536                                 | 5.9 $\pm$ 0.5  | 9.6 $\pm$ 2.6 |
|                      | 7              | $1.7 \times 10^{10} \pm 0.2 \times 10^{10}$ | 59,971 $\pm$ 8183      | 2610 $\pm$ 355    | 8862 $\pm$ 1178                                | 7.1 $\pm$ 0.5  | 25 $\pm$ 4.8  |
|                      | 14             | $1.9 \times 10^{10} \pm 0.3 \times 10^{10}$ | 61,900 $\pm$ 6612      | 2667 $\pm$ 278    | 8832 $\pm$ 577                                 | 7.4 $\pm$ 0.3  | 24 $\pm$ 3.9  |
|                      | 28             | $2.1 \times 10^{10} \pm 0.3 \times 10^{10}$ | 59,643 $\pm$ 5397      | 2855 $\pm$ 123    | 9693 $\pm$ 415                                 | 8.0 $\pm$ 0.3  | 29 $\pm$ 5.6  |
|                      | 57             | $4.7 \times 10^9 \pm 0.9 \times 10^9$       | 64,432 $\pm$ 3402      | 2286 $\pm$ 388    | 7049 $\pm$ 1238                                | 7.5 $\pm$ 0.5  | 40 $\pm$ 7.4  |
| Deep                 | 1              | $7.4 \times 10^9 \pm 5.0 \times 10^9$       | 55,234 $\pm$ 1467      | 3368 $\pm$ 49     | 15,068 $\pm$ 323                               | 10.6 $\pm$ 0.0 | 346 $\pm$ 14  |
|                      | 3              | $1.2 \times 10^{10} \pm 0.3 \times 10^{10}$ | 52,991 $\pm$ 4773      | 3277 $\pm$ 42     | 14,553 $\pm$ 358                               | 10.4 $\pm$ 0.1 | 297 $\pm$ 35  |
|                      | 7              | $1.9 \times 10^{10} \pm 0.2 \times 10^{10}$ | 55,281 $\pm$ 8200      | 3355 $\pm$ 57     | 14,649 $\pm$ 197                               | 10.5 $\pm$ 0.1 | 319 $\pm$ 21  |
|                      | 14             | $1.4 \times 10^{10} \pm 0.1 \times 10^{10}$ | 49,383 $\pm$ 1844      | 3236 $\pm$ 48     | 14,642 $\pm$ 369                               | 10.3 $\pm$ 0.4 | 231 $\pm$ 150 |
|                      | 28             | $1.7 \times 10^{10} \pm 0.2 \times 10^{10}$ | 47,263 $\pm$ 14,664    | 3246 $\pm$ 234    | 14,665 $\pm$ 137                               | 10.6 $\pm$ 0.1 | 354 $\pm$ 23  |
|                      | 57             | $1.9 \times 10^{10} \pm 0.7 \times 10^{10}$ | 61,624 $\pm$ 13,336    | 3243 $\pm$ 190    | 14,338 $\pm$ 402                               | 10.5 $\pm$ 0.0 | 304 $\pm$ 12  |

<sup>a</sup> The symbol “ $\pm$ ” in the column of “No. of copies” means variation between two replications and the symbol in the other column means standard deviation of three replications.

60 <sup>b</sup> 16S rRNA genes per gram sediment.

<sup>c</sup> Diversity indexes were calculated by using an equal number of sequences (31,950) subsampled 10 times from original libraries.

<sup>d</sup> Sediment sample before incubation (day 0).

**Table S5** Most abundant OTUs and their closely related species found in the uppermost layer of the sediment incubated in laboratory

| Incubation day | OTU No. | Closely related species <sup>a</sup>    | Similarity (%) | Accession No. | Phylum/Class <sup>b</sup> | Relative abundance (%) <sup>c</sup> | <i>p</i> -value <sup>d</sup> | Putative function <sup>e</sup> |
|----------------|---------|-----------------------------------------|----------------|---------------|---------------------------|-------------------------------------|------------------------------|--------------------------------|
| 7              | 45161   | <i>Thioalkalispira microaerophila</i>   | 98             | AF481118      | Gammaproteobacteria       | 12.1 ± 1.6                          | <0.001**                     | SO, NR                         |
|                | 32337   | <i>Mariprofundus ferrooxydans</i>       | 96             | EF493244      | Zetaproteobacteria        | 10.7 ± 1.8                          | 0.001**                      | FeO                            |
|                | 42344   | <i>Sulfurimonas autotrophica</i>        | 92             | CP002505      | Epsilonproteobacteria     | 9.2 ± 0.6                           | <0.001**                     | Unknown                        |
|                | 25387   | <i>Sulfurovum aggregans</i>             | 96             | AB889689      | Epsilonproteobacteria     | 5.0 ± 1.4                           | 0.004**                      | SO, NR                         |
|                | 46057   | <i>Sulfurimonas sp.</i>                 | 92             | LC029406      | Epsilonproteobacteria     | 4.5 ± 1.2                           | 0.004**                      | Unknown                        |
|                | 30483   | <i>Sulfurimonas denitrificans</i>       | 98             | L40808        | Epsilonproteobacteria     | 4.5 ± 1.9                           | 0.02*                        | SO, NR                         |
|                | 49085   | <i>Sulfurimonas sp.</i>                 | 90             | AB304903      | Epsilonproteobacteria     | 4.3 ± 0.7                           | 0.001**                      | Unknown                        |
| 28             | 45161   | <i>Thioalkalispira microaerophila</i>   | 98             | AF481118      | Gammaproteobacteria       | 17.7 ± 1.9                          | <0.001**                     | SO, NR                         |
|                | 6816    | <i>Gallionella sp.</i>                  | 97             | HQ117915      | Betaproteobacteria        | 3.9 ± 1.1                           | 0.004**                      | FeO                            |
|                | 16111   | <i>Thiohalophilus thiocyanatoxydans</i> | 96             | DQ469584      | Gammaproteobacteria       | 3.3 ± 0.0                           | <0.001**                     | SO, NR                         |
|                | 35447   | <i>Marinobacter guineae</i>             | 100            | KX161417      | Gammaproteobacteria       | 2.7 ± 0.3                           | <0.001**                     | ChemO, NR                      |
|                | 23047   | <i>Oleigrimonas soli</i>                | 98             | JQ658406      | Gammaproteobacteria       | 2.7 ± 0.8                           | 0.005**                      | ChemO, NR                      |
|                | 32337   | <i>Mariprofundus ferrooxydans</i>       | 96             | EF493244      | Zetaproteobacteria        | 2.6 ± 0.8                           | 0.004**                      | FeO                            |
|                | 25387   | <i>Sulfurovum aggregans</i>             | 96             | AB889689      | Epsilonproteobacteria     | 2.2 ± 0.5                           | 0.002**                      | SO, NR                         |

<sup>a</sup> The closely related species were assigned on BLAST in the DDBJ.

<sup>b</sup> The OTUs were characterized phylogenetically by using the QIIME software.

<sup>c</sup> The symbol “±” means standard deviation of three replications.

<sup>d</sup> *p*-values indicate whether the relative abundance of OTU was significantly high comparing with that in the deep layer: (\*) *p* < 0.05, (\*\*) *p* < 0.01.

<sup>e</sup> The putative function of closely related species (only sequence similarities >95%). SO, sulfur oxidation; SR, sulfate reduction; FeO, Fe (II) oxidation; ChemO, chemoorganotrophy; NR, nitrate reduction.
